# Supplementary material
Source: publisher figshare collection journal article supplement (https://karger.figshare.com/ndownloader/files/12940040)
Supplement: Supplementary file 1 [file 12940040]

**Supplemental Table 1:** Intradialytic Activity Level and Interest in Participating in Intradialytic Cognitive Tasks (n=424) and Physical Exercise (n=421) Among Adults Undergoing Hemodialysis

|                                 | Interest in Intradialytic |                     |
|---------------------------------|---------------------------|---------------------|
|                                 | Brain Games<br>(n=424)    | Exercise<br>(n=421) |
| Participants Interested         | 67.9%                     | 76.0%               |
| Odds Ratio (95% CI) of Interest |                           |                     |
| Activity Index                  | 1.30 (1.08, 1.57)         | 1.24 (1.03, 1.52)   |
| Younger age (<65 years)         | 3.15 (1.94, 5.13)         | 1.04 (0.61, 1.80)   |
| Female sex                      | 0.80 (0.51, 1.25)         | 0.76 (0.47, 1.23)   |
| Black race                      | 1.26 (0.82, 1.65)         | 1.42 (0.90, 2.26)   |
| Frail                           | 0.93 (0.52, 1.65)         | 0.89 (0.48, 1.63)   |

Note: Higher intradialytic activity levels as measured by this index reflects more activity during the dialysis session. Smaller study samples in this analysis reflect survey item nonresponse.
